# Supplementary material
Source: PubMed Central journal article supplement (PMC7181083)

**Supplementary Table 1. Details of MRI parameters and definition of lacunes.**

| Reference Number                             | 1st Author Year  | Study Name  | Term for Lacunes         | MR Field Strength | Thickness/ Gap (mm) | Matrix  | Size (mm) | Signal Characteristics                                                 | Differential Diagnosis of Perivascular Spaces | Location of Incident Lacunes | Reproducibility                     |
|----------------------------------------------|------------------|-------------|--------------------------|-------------------|---------------------|---------|-----------|------------------------------------------------------------------------|-----------------------------------------------|------------------------------|-------------------------------------|
| <b>Population-Based Cohorts</b>              |                  |             |                          |                   |                     |         |           |                                                                        |                                               |                              |                                     |
| 55                                           | Nylander 2018    | PIVUS       | Lacunar infarcts         | 1.5T              | 1.2-3/0             | NS      | 3-15      | Hypointense on T1, hyperintense on T2 and isointense proton density    | Location                                      | No                           | NS                                  |
| 56                                           | Nylander 2018    | PIVUS       | Lacunar infarcts         | 1.5T              | 1.2-3/0             | NS      | 3-15      | Hypointense on T1, hyperintense on T2 and isointense proton density    | Location                                      | No                           | NS                                  |
| 17                                           | Sigurdsson 2017  | AGES        | Infarcts                 | 1.5T              | 3/NS                | NS      | ≥4        | CSF intensity on FLAIR and T2                                          | Hyperintense rim on FLAIR and size            | Yes                          | intra κ 0.89 and 0.93. inter κ 0.76 |
| 28                                           | Dearborn 2015    | ARIC        | Lacunes                  | 1.5T              | 5/0                 | 256*192 | 3-20      | Hyperintense on T2 and proton density, hypointense on T1               | NS                                            | No                           | NS                                  |
| 29                                           | Haring 2015      | ARIC        | Silent cerebral infarcts | 1.5T              | 5/0                 | 256*192 | ≥3        | Hyperintense on T2 and proton density, hypointense on T1               | NS                                            | No                           | NS                                  |
| 30                                           | Windham 2012     | ARIC        | Lacunar infarcts         | 1.5T              | 5/0                 | 256*192 | ≥3        | Hyperintense on T2/proton density, hypointense on T1                   | NS                                            | No                           | NS                                  |
| 31                                           | Knopman 2011     | ARIC        | Silent brain infarcts    | 1.5T              | 5/0                 | 256*192 | ≥3        | Hyperintense on T2 and proton density, hypointense on T1               | NS                                            | No                           | interrater agreement 89%.           |
| 32                                           | Cheung 2010      | ARIC        | Infarcts                 | 1.5T              | 5/0                 | 256*192 | 3-20      | Hyperintense on T2 and proton density, hypointense on T1               | Using proton density                          | No                           | NS                                  |
| 33                                           | Virtanen 2013    | CHS         | Subclinical infarcts     | 1.5T/0.35 T       | 5/0                 | NS      | ≥3        | In GM: hyperintense on T2 and proton density, In WM, hypointense on T1 | Using spin-density                            | No                           | NS                                  |
| 18                                           | Longstreth 2011  | CHS         | Infarcts                 | 1.5T/0.35 T       | 5/0                 | NS      | ≥3        | In GM: hyperintense on T2 and proton density, In WM, hypointense on T1 | NS                                            | No                           | NS                                  |
| 19                                           | Longstreth 2002  | CHS         | Lacunes                  | 1.5T/0.35 T       | 5/0                 | NS      | 3-20      | In GM: hyperintense on T2 and proton density, In WM, hypointense on T1 | Using spin-density                            | Yes                          | NS                                  |
| 34                                           | Satizabal 2012   | 3C          | Silent brain infarcts    | 1.5T              | 3.5/0.5             | 256*192 | ≥3        | CSF intensity in T1, T2 and proton density                             | Shape, size and location                      | No                           | NS                                  |
| 36                                           | Chen 2009        | PTLS        | Lacunar infarcts         | 1.5T              | 1.5-2/0-1           | 256*256 | 3-20      | Hypointense on T1 and FLAIR, hyperintense rim on FLAIR                 | NS                                            | Yes                          | NS                                  |
| 37                                           | van Dijk 2008    | RSS         | Lacunar infarcts         | 1.5T              | 5-6/1-1.2           | 256*192 | 3-20      | In GM: hyperintense on T2, In WM: hypointense on T1                    | NS                                            | No                           | NS                                  |
| 38                                           | Ikram 2006       | RSS         | Lacunar infarcts         | 1.5T              | 5-6/1-1.2           | 256*192 | 3-20      | In GM: hyperintense on T2, In WM: hypointense on T1                    | NS                                            | No                           | NS                                  |
| 39                                           | van Dijk 2005    | RSS         | Lacunar infarcts         | 1.5T              | 5-6/1-1.2           | 256*192 | 3-20      | In GM: hyperintense on T2, In WM: hypointense on T1                    | NS                                            | No                           | NS                                  |
| 40                                           | Schmidt 2006     | ASPS        | Lacunes                  | 1.5T              | 5/NS                | 128*256 | <10       | CSF intensity in T1, T2 and FLAIR                                      | NS                                            | No                           | NS                                  |
| <b>Patients with Cerebrovascular Disease</b> |                  |             |                          |                   |                     |         |           |                                                                        |                                               |                              |                                     |
| 59                                           | van Leijsen 2018 | RUN DMC     | Lacunes                  | 1.5T              | 1/0                 | NS      | 3-15      | Hypointense on FLAIR and T1                                            | Size and location                             | No                           | intra κ 0.87 inter κ 0.95           |
| 60                                           | Staszewsk 2018   | SHEF-CSVD   | Lacunar infarcts         | 1.5T              | 5/0                 | NS      | 3-15      | Hyperintense on T2, hypointense on T1, and hyperintense rim on FLAIR   | Hyperintense rim on FLAIR and size            | No                           | NS                                  |
| 42                                           | Benjamin 2016    | SCANS study | Lacunes                  | 1.5T              | 1.1/NS              | 256*192 | 3-15      | CSF intensity in T1, T2 and FLAIR                                      | Size                                          | No                           | NS                                  |

|                                            |                   |                      |                                   |           |           |                                        |      |                                                                   |                                    |     |                   |
|--------------------------------------------|-------------------|----------------------|-----------------------------------|-----------|-----------|----------------------------------------|------|-------------------------------------------------------------------|------------------------------------|-----|-------------------|
| 49                                         | Xiong 2014        | VITATOPS MRI         | Lacunes                           | 1.5T      | 5/0.5     | 256*256                                | <15  | CSF intensity in T1, T2 and FLAIR                                 | NS                                 | No  | NS                |
| 50                                         | Cavalieri 2012    | VITATOPS MRI         | Lacunes                           | 1.5T      | 5/0.5     | 256*256                                | <15  | CSF intensity in T1, T2 and FLAIR                                 | NS                                 | No  | NS                |
| 26                                         | Jokinen 2011      | LADIS                | Lacunes                           | 1.5T/0.5T | 5/NS      | NS                                     | 3-10 | CSF intensity in T1, T2 and FLAIR                                 | Hyperintense rim on FLAIR and size | Yes | ICC 0.84          |
| 35                                         | Gouw 2008         | LADIS                | Lacunes                           | 1.5T/0.5T | 5/NS      | NS                                     | 3-10 | CSF intensity in T1, T2 and FLAIR                                 | Hyperintense rim on FLAIR and size | No  | NS                |
| 54                                         | Walters 2003      | St Mary's Hospital   | Silent ischemic lesions           | 1.5T      | NS/NS     | 256*192                                | NS   | Using proton density and T2                                       | NS                                 | No  | NS                |
| <b>Patients with Vascular Risk Factors</b> |                   |                      |                                   |           |           |                                        |      |                                                                   |                                    |     |                   |
| 41                                         | van Dalen 2017    | preDIVA trial        | Lacunar infarcts                  | 3T        | 1.12/0.56 | NS                                     | 3-15 | Hypointense on FLAIR                                              | NS                                 | No  | NS                |
| 58                                         | Uiterwijk 2017    | HYBRID               | Lacunes                           | 1.5T      | 5/0.5     | T2: 512*512, FLAIR: 512*512            | 3-15 | Hyperintense on T2, hypointense with a hyperintense rim on FLAIR. | NS                                 | No  | inter κ 0.62      |
| 57                                         | Kloppenborg 2017  | SMART-MR             | Lacunar infarcts                  | 1.5T      | 4/0       | 180*256                                | 3-15 | Hyperintense on T2, hypointense on T1 and FLAIR                   | Location, form, and gliosis        | Yes | NS                |
| 43                                         | van der Veen 2015 | SMART-MR             | Lacunes                           | 1.5T      | 4/0       | 180*256                                | 3-15 | Hyperintense on T2, hypointense on T1 and FLAIR                   | Location, form, and gliosis        | No  | NS                |
| 44                                         | van der Veen 2015 | SMART-MR             | Lacunar infarcts                  | 1.5T      | 4/0       | 180*256                                | 3-15 | Hyperintense on T2, hypointense on T1 and FLAIR                   | Location, form, and gliosis        | No  | NS                |
| 45                                         | Jochemsen 2015    | SMART-MR             | Lacunar infarcts                  | 1.5T      | 4/0       | 180*256                                | 3-15 | Hyperintense on T2, hypointense on T1 and FLAIR                   | Location, form, and gliosis        | No  | NS                |
| 46                                         | van der Veen 2014 | SMART-MR             | Infarcts                          | 1.5T      | 4/0       | 180*256                                | 3-15 | Hyperintense on T2, hypointense on T1 and FLAIR                   | Location, form, and gliosis        | No  | NS                |
| 47                                         | Kloppenborg 2014  | SMART-MR             | Lacunar infarcts                  | 1.5T      | 4/0       | 180*256                                | 3-15 | Hyperintense on T2, hypointense on T1 and FLAIR                   | Location, form, and gliosis        | No  | NS                |
| 48                                         | Jochemsen 2012    | SMART-MR             | Lacunar infarcts                  | 1.5T      | 4/0       | 180*256                                | 3-15 | Hyperintense on T2, hypointense on T1 and FLAIR                   | Location, form, and gliosis        | No  | NS                |
| 51                                         | Saito 2014        | Asahikawa Hospital   | Asymptomatic cerebral infarctions | 1.5T      | 5.5/1     | 256*256                                | NS   | Hyperintense on T2, hypointense on T1                             | NS                                 | No  | NS                |
| 52                                         | Umamura 2011      | Chubu Rosai Hospital | Silent brain infarcts             | 1.5T      | 5/2       | T1: 320*224, T2:156*256, FLAIR:256*192 | >3   | Hyperintense on T2, hypointense on T1 and FLAIR                   | Hyperintense rim on FLAIR and size | No  | Cohen κ 0.75-0.86 |
| 53                                         | Imamine 2011      | Chubu Rosai Hospital | Silent brain infarcts             | 1.5T      | 5/2       | T1: 320*224, T2:156*256, FLAIR:256*192 | >3   | Hyperintense on T2, hypointense on T1 and FLAIR                   | Hyperintense rim on FLAIR and size | No  | NS                |

Abbreviations: MR: Magnetic Resonance, PIVUS: Prospective Investigation of the Vasculature in Uppsala Seniors study, AGES: Age Gene/Environment Susceptibility-Reykjavik study, ARIC: Atherosclerosis Risk in Communities study, CHS: CardioVascular Health Study, 3C: Three-City-Dijon Study, PTLs: PATH Through Life Study, RSS: Rotterdam Scan Study, ASPs: Austrian Stroke Prevention Study, RUN DMC: Radboud University Nijmegen Diffusion Tensor and Magnetic Resonance Imaging Cohort, SHEF-CSVD: Significance of Haemodynamic and Haemostatic Factors in the Course of Different Manifestations of Cerebral Small Vessel Disease Study, SCANS: St George's Cognition and Neuroimaging in Stroke study, VITATOPS: VITamins TO Prevent Stroke MRI-Substudy, LADIS : Leukoaraiosis and Disability study, preDIVA : Prevention of Dementia by Intensive Vascular Care study, SMART-MR: Second Manifestations of Arterial Disease-Magnetic Resonance study, HYBRID: Hypertension and brain damage study, CSVD: cerebral small vessel diseases, CSF: cerebral spinal fluid , FLAIR: fluid-attenuated inversion recovery, GM: gray matter, WM: white matter, NS: not specified, ICC: intraclass correlation coefficient



**Supplementary Table 2. Predictors of incident lacunes in patients with cerebrovascular disease**

| <b>BASELINE PREDICTORS</b>            | <b>REFERENCES OF STUDIES WITH A SIGNIFICANT ASSOCIATION</b> | <b>REFERENCES OF STUDIES WITH NO SIGNIFICANT ASSOCIATION</b> |
|---------------------------------------|-------------------------------------------------------------|--------------------------------------------------------------|
| <b>Age</b>                            |                                                             | 35                                                           |
| <b>Sex</b>                            |                                                             |                                                              |
| Female                                |                                                             | 35                                                           |
| <b>Blood pressure</b>                 |                                                             |                                                              |
| Hypertension                          |                                                             | 35                                                           |
| Systolic blood pressure               | 35                                                          |                                                              |
| Diastolic blood pressure              | 35*                                                         |                                                              |
| <b>Dyslipidemia</b>                   |                                                             |                                                              |
| Total cholesterol                     |                                                             | 35                                                           |
| Triglycerides                         |                                                             | 35                                                           |
| High-density lipoprotein              | 35*                                                         |                                                              |
| Low-density lipoprotein               | 35*                                                         |                                                              |
| <b>Diabetes</b>                       |                                                             |                                                              |
| Diabetes                              |                                                             | 35                                                           |
| Glucose                               |                                                             | 35                                                           |
| <b>Metabolic syndrome and Obesity</b> |                                                             |                                                              |
| Body mass index                       |                                                             | 35                                                           |
| <b>Smoking</b>                        |                                                             | 35                                                           |
| <b>Atrial fibrillation</b>            |                                                             | 35                                                           |
| <b>Previous stroke</b>                |                                                             | 35, 49                                                       |
| <b>Myocardial infarction</b>          |                                                             | 35                                                           |
| <b>MRI markers</b>                    |                                                             |                                                              |
| Lacunes                               | 35                                                          |                                                              |
| White matter hyperintensities         | 35                                                          |                                                              |
| <b>Others</b>                         |                                                             |                                                              |
| Plasma A $\beta$ 38                   | 59                                                          |                                                              |
| Plasma A $\beta$ 40                   |                                                             | 59                                                           |
| Plasma A $\beta$ 42                   |                                                             | 59                                                           |
| CRP                                   |                                                             | 60                                                           |
| Z-score of systematic inflammation    | 60                                                          |                                                              |
| Hyperhomocysteinemia                  | 60                                                          |                                                              |
| IL-6                                  |                                                             | 60                                                           |
| IL-1 $\alpha$                         |                                                             | 60                                                           |
| TNF- $\alpha$                         |                                                             | 60                                                           |
| B-vitamin supplementation             |                                                             | 50                                                           |

Abbreviations: CRP: C-reactive protein, IL-6: interleukin-6, IL-1 $\alpha$ : interleukin-1 $\alpha$ , TNF- $\alpha$ : Tumor necrosis factor- $\alpha$

\* These predictors with a significant adjusted OR < 1.0

**Supplementary Table 3. Predictors of incident lacunes in patients with vascular risk factors**

| <b>BASELINE PREDICTORS</b>          | <b>REFERENCES OF STUDIES WITH A SIGNIFICANT ASSOCIATION</b> | <b>REFERENCES OF STUDIES WITH NO SIGNIFICANT ASSOCIATION</b> |
|-------------------------------------|-------------------------------------------------------------|--------------------------------------------------------------|
| <b>Age</b>                          | 46                                                          |                                                              |
| <b>Sex</b>                          |                                                             |                                                              |
| Male                                | 46                                                          |                                                              |
| <b>Blood pressure</b>               |                                                             |                                                              |
| Hypertension                        | 47 <sup>b</sup>                                             |                                                              |
| Systolic blood pressure             |                                                             |                                                              |
| Diastolic blood pressure            |                                                             |                                                              |
| Hypertensive Target Organ Damage    |                                                             | 44                                                           |
| <b>Diabetes</b>                     |                                                             |                                                              |
| sICAM-1                             | 52                                                          |                                                              |
| <b>Peripheral arterial disease</b>  |                                                             | 46                                                           |
| <b>Abdominal aortic aneurysm</b>    | 46                                                          |                                                              |
| <b>Cerebrovascular disease</b>      | 46                                                          |                                                              |
| <b>Vascular markers</b>             |                                                             |                                                              |
| Stiffening of carotid arteries      |                                                             | 45                                                           |
| <b>MRI markers</b>                  |                                                             |                                                              |
| Parenchymal CBF                     |                                                             | 43                                                           |
| White matter hyperintensities       | 47 <sup>b</sup>                                             |                                                              |
| <b>Others</b>                       |                                                             |                                                              |
| Serum ACE                           |                                                             | 48                                                           |
| CRP                                 | 52                                                          |                                                              |
| Hyperhomocysteinemia                | 47 <sup>a</sup>                                             |                                                              |
| Multidomain intensive vascular care |                                                             | 41                                                           |

Abbreviations: sICAM-1: soluble intercellular adhesion molecule-1, CBF: cerebral blood flow, ACE: angiotensin-converting-enzyme, CRP: C-reactive protein

<sup>a</sup> Independently associated with incident lacunes in all location and the basal ganglia.

<sup>b</sup> Independently associated with incident lacunes in the deep white matter.

Supplementary Figure 1. Study selection flow diagram.

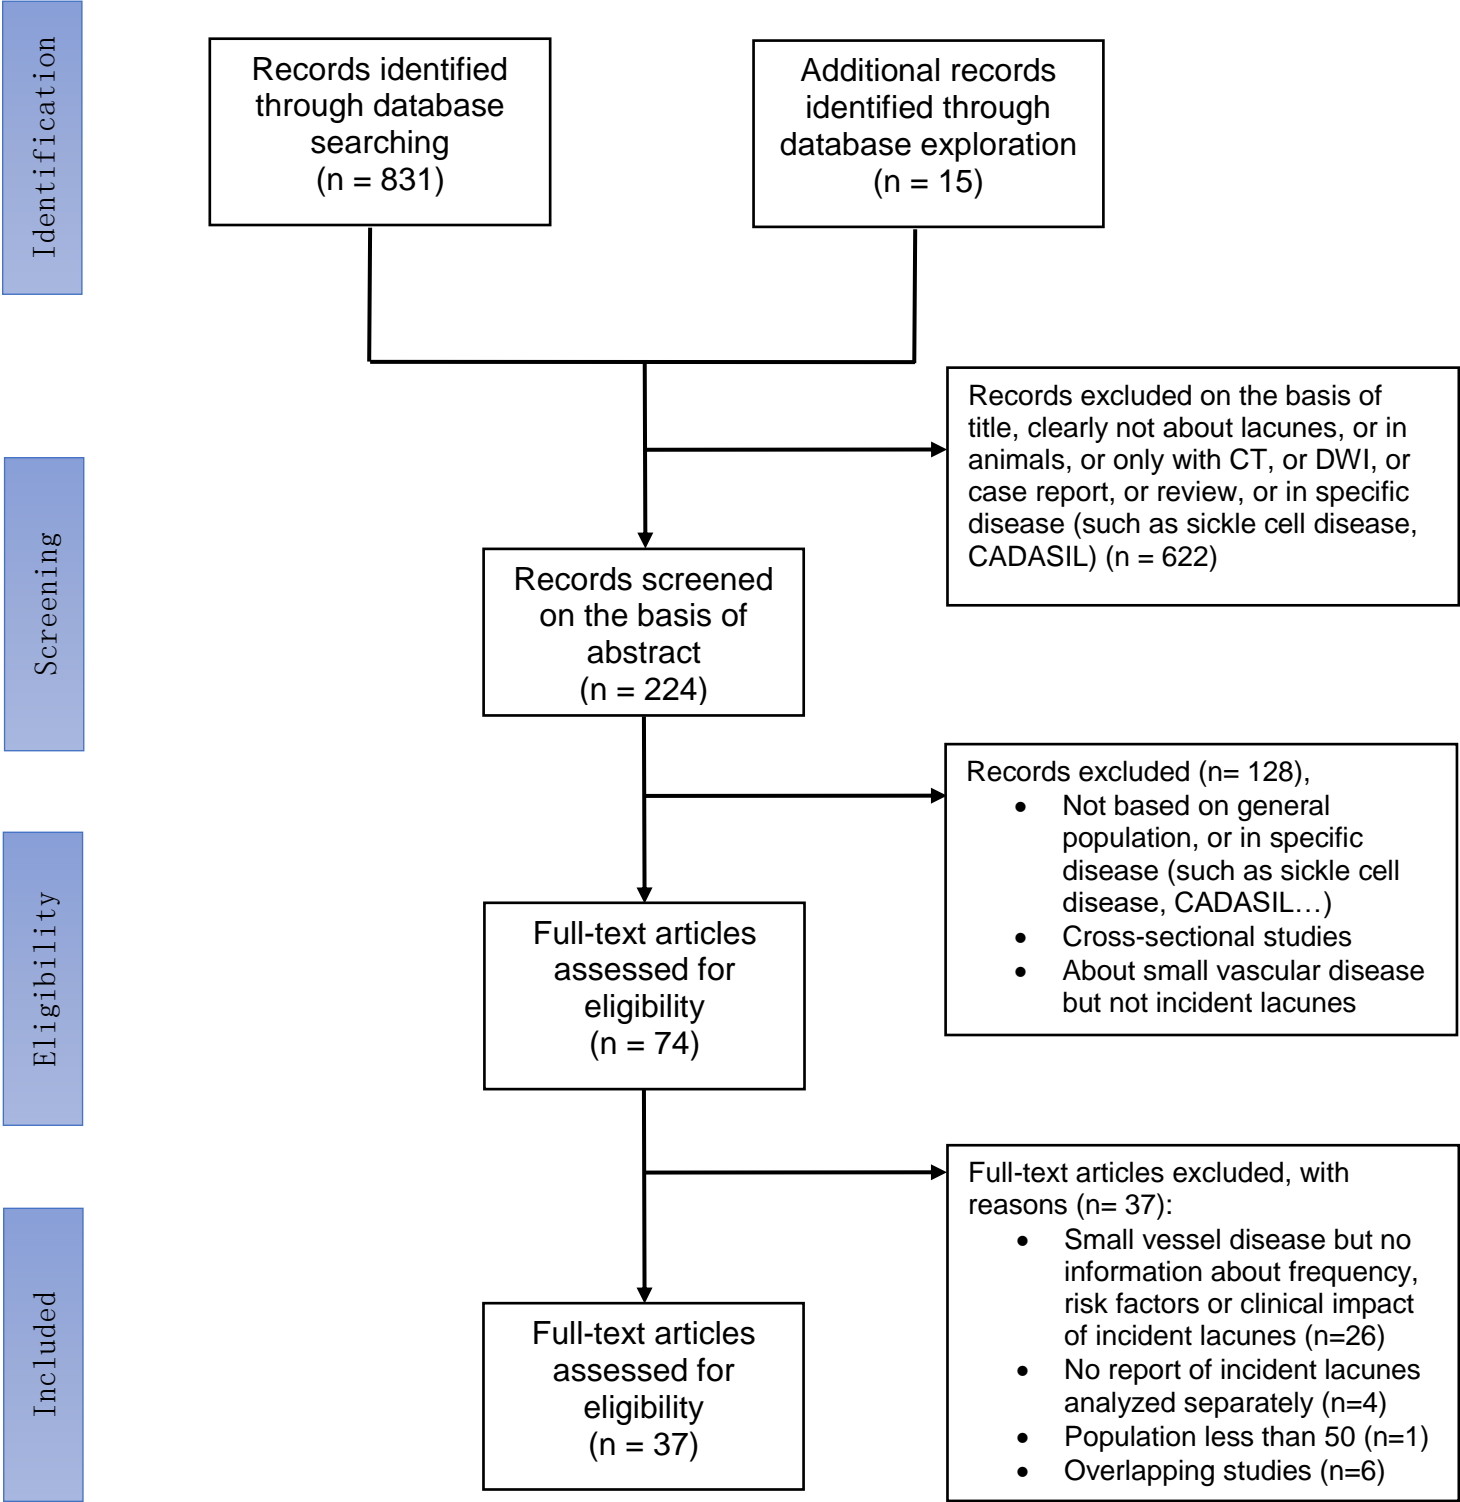

Supplement: JCB908361_Supplemental_Material.pdf [file JCB908361_Supplemental_Material.pdf]
